# Supplementary material for: Initiation reactions in the high temperature decomposition of styrene
Source: Royal Society of Chemistry journal article supplement (doi:10.1039/d1cp02437j), 2021-01-01
Supplement: d1cp02437j3.pdf [file d1cp02437j3.pdf]

## Supplemental Material

**Figure S1.** Mass spectra on a linear scale taken with MgF<sub>2</sub> window ~150 μs after the shock front arrival in a 0.06% C<sub>8</sub>H<sub>8</sub>/99.94% Ar mixture. Mass spectra are integrated from 8 – 10.5 eV.

**Figure S2.** Mass spectra on a linear scale from photoionization (top) and electron impact (bottom) TOF-MS experiments ~150 μs post-shock. PI spectra were taken at 1875 ± 25 K, 11.3 ± 0.2 atm, 0.25% C<sub>8</sub>H<sub>8</sub>/99.75% Ar, and integrated from 8 – 10.5 eV. EI spectra were taken at 1830 ± 25 K, 368 ± 7 Torr, 0.5% C<sub>8</sub>H<sub>8</sub>/1.0% Ar/98.5% Ne and 21 eV.

**Figure S3.** Mass spectra on a linear scale from photoionization (top) and electron impact (bottom) TOF-MS experiments pre-shock/non-reactive. PI spectra were taken at 1875 ± 25 K, 11.3 ± 0.2 atm, 0.25% C<sub>8</sub>H<sub>8</sub>/99.75% Ar, and integrated from 8 – 10.5 eV. EI spectra were taken at 1830 ± 25 K, 368 ± 7 Torr, 0.5% C<sub>8</sub>H<sub>8</sub>/1.0% Ar/98.5% Ne and 21 eV.

**Figure S4.** EI time history of m/z 74 at 1830 ± 25 K, 368 ± 7 Torr, 0.5% C<sub>8</sub>H<sub>8</sub>/1.0% Ar/98.5% Ne and 21 eV. Symbols represent the data, lines are experimental fits for clarity only, and shading is the 95% confidence interval of the experimental fit.

**Figure S5.** PI time history of m/z 74 with the MgF<sub>2</sub> filter at 1875 ± 25 K, 11.3 ± 0.2 atm, 0.25% C<sub>8</sub>H<sub>8</sub>/99.75% Ar, and integrated from 8 – 10.5 eV. Symbols represent the data, lines are experimental fits for clarity only, and shading is the 95% confidence interval of the experimental fit.

**Figure S6.** Simulation of [C<sub>8</sub>H<sub>6</sub>]/[C<sub>8</sub>H<sub>8</sub>] at 150 μs in a constant volume reactor showing the effect of pressure.

**Figure S7.** Percentage that R2: C<sub>8</sub>H<sub>8</sub> → β-C<sub>8</sub>H<sub>7</sub> + H comprises of the total styrene decomposition rate based upon the current mechanism. The conditions of the current study and literature studies are emphasized.

**Figure S8.** Percentage that R3: C<sub>8</sub>H<sub>8</sub> → o-C<sub>8</sub>H<sub>7</sub> + H comprises of the total styrene decomposition rate based upon the current mechanism. The conditions of the current study and literature studies are emphasized.

**Figure S9.** Percentage that R4: C<sub>8</sub>H<sub>8</sub> → m-C<sub>8</sub>H<sub>7</sub> + H comprises of the total styrene decomposition rate based upon the current mechanism. The conditions of the current study and literature studies are emphasized.

**Figure S10.** Percentage that R5: C<sub>8</sub>H<sub>8</sub> → p-C<sub>8</sub>H<sub>7</sub> + H comprises of the total styrene decomposition rate based upon the current mechanism. The conditions of the current study and literature studies are emphasized.

**Figure S11.** CHEMKIN-based normalized [C<sub>8</sub>H<sub>8</sub>] sensitivity of the current mechanism while simulating the Müller-Markgraf and Troe study.

**Table S1.** Species name translations for mechanism names, chemical names, and InChI. InChiKey is suitable for internet and PubChem database searching.

**Table S2.** List of density, refractive index, and molar refractivity for mixture species.

**Table S3.** List of LS experimental conditions and rate coefficients for k<sub>decomp</sub> (the total rate of styrene decomposition) at 60 Torr.

**Table S4.** List of LS experimental conditions and rate coefficients for k<sub>decomp</sub> (the total rate of styrene decomposition) at 120 Torr.

**Table S5.** List of LS experimental conditions and rate coefficients for k<sub>decomp</sub> (the total rate of styrene decomposition) at 240 Torr.

**Table S6.** Stationary point energies for the thermal decomposition reactions of Styrene.

**Table S7.** Structures and frequencies for relevant molecules and reactions on the C<sub>8</sub>H<sub>8</sub> PES at the M06-2X/cc-pvtz level of theory.

**Styrene - PLOG.ck**– Full mechanism
